# Supplementary material for: Trajectories of Physical Work Capacity in Early Symptomatic Osteoarthritis of Hip and Knee: Results from the Cohort Hip and Cohort Knee (CHECK) Study
Source: Springer Nature journal article supplement (doi:10.1007/s10926-018-9809-3), 2018-08-27
Supplement: MOESM2 [file 16075932]

## Sheet: T0
		Table A02: Comparison (independent samples t-test) between dropouts (complete = 0) en de non-dropouts (complete = 1)
		Data at T0						Pooled imputed data at T0
Covariates:
	WOMAC(Function)
		complete	N	Mean	Std Dev	Std Err		complete	N	Mean	Std Dev	Std Err
		0	71	75.9528	16.6325	1.9739		0	71	75.9528	16.6325	1.9739
		1	24	67.2181	19.8889	4.0598		1	25	67.4911	19.5179	3.9036
		Diff (1-2)		8.7346	17.4944	4.1307		Diff (1-2)		8.4617	17.4147	4.05
		Method	Variances	DF	t Value	Pr > |t|		Method	Variances	DF	t Value	Pr > |t|
		Pooled	Equal	93	2.11	0.0371		Pooled	Equal	94	2.09	0.0394
	WOMAC(pain)
		complete	N	Mean	Std Dev	Std Err		complete	N	Mean	Std Dev	Std Err
		0	70	75.2857	16.4159	1.9621		0	71	75.252	16.3007	1.9345
		1	24	67.7083	17.3818	3.5481		1	25	67.9422	17.056	3.4112
		Diff (1-2)		7.5774	16.6627	3.9414		Diff (1-2)		7.3099	16.4968	3.8365
		Method	Variances	DF	t Value	Pr > |t|		Method	Variances	DF	t Value	Pr > |t|
		Pooled	Equal	92	1.92	0.0576		Pooled	Equal	94	1.91	0.0598
	Work participation
		complete	N	Mean	Std Dev	Std Err		complete	N	Mean	Std Dev	Std Err
		0	71	0.4225	0.4975	0.059		0	71	0.4225	0.4975	0.059
		1	25	0.36	0.4899	0.098		1	25	0.36	0.4899	0.098
		Diff (1-2)		0.0625	0.4956	0.1152		Diff (1-2)		0.0625	0.4956	0.1152
		Method	Variances	DF	t Value	Pr > |t|		Method	Variances	DF	t Value	Pr > |t|
		Pooled	Equal	94	0.54	0.5887		Pooled	Equal	94	0.54	0.5887
FCE tests:
	Lifting Low (kg)
		complete	N	Mean	Std Dev	Std Err		complete	N	Mean	Std Dev	Std Err
		0	70	18.7079	8.8083	1.0528		0	71	18.7066	8.7452	1.0379
		1	25	22.6252	9.3513	1.8703		1	25	22.6252	9.3513	1.8703
		Diff (1-2)		-3.9173	8.9516	2.0857		Diff (1-2)		-3.9186	8.9039	2.0707
		Method	Variances	DF	t Value	Pr > |t|		Method	Variances	DF	t Value	Pr > |t|
		Pooled	Equal	93	-1.88	0.0635		Pooled	Equal	94	-1.89	0.0615
	Lifting High (kg)
		complete	N	Mean	Std Dev	Std Err		complete	N	Mean	Std Dev	Std Err
		0	67	9.4272	4.5394	0.5546		0	71	9.4706	4.4122	0.5236
		1	25	10.9776	5.9849	1.197		1	25	10.9776	5.9849	1.197
		Diff (1-2)		-1.5504	4.9662	1.1639		Diff (1-2)		-1.507	4.8623	1.1308
		Method	Variances	DF	t Value	Pr > |t|		Method	Variances	DF	t Value	Pr > |t|
		Pooled	Equal	90	-1.33	0.1862		Pooled	Equal	94	-1.33	0.1858
	Carrying (kg)
		complete	N	Mean	Std Dev	Std Err		complete	N	Mean	Std Dev	Std Err
		0	69	21.2365	9.6168	1.1577		0	71	21.2551	9.479	1.125
		1	25	25.4252	11.9119	2.3824		1	25	25.4252	11.9119	2.3824
		Diff (1-2)		-4.1887	10.2651	2.3962		Diff (1-2)		-4.1701	10.1558	2.3618
		Method	Variances	DF	t Value	Pr > |t|		Method	Variances	DF	t Value	Pr > |t|
		Pooled	Equal	92	-1.75	0.0838		Pooled	Equal	94	-1.77	0.0807
	Overhead static
		complete	N	Mean	Std Dev	Std Err		complete	N	Mean	Std Dev	Std Err
		0	68	172.4	73.3615	8.8964		0	71	172.3	71.7758	8.5182
		1	24	158.9	82.0084	16.7399		1	25	159.2	80.3013	16.0603
		Diff (1-2)		13.5285	75.6654	17.9652		Diff (1-2)		13.0475	74.0459	17.2202
		Method	Variances	DF	t Value	Pr > |t|		Method	Variances	DF	t Value	Pr > |t|
		Pooled	Equal	90	0.75	0.4534		Pooled	Equal	94	0.76	0.4505
	Repetitive knee bending
		complete	N	Mean	Std Dev	Std Err		complete	N	Mean	Std Dev	Std Err
		0	66	52.4165	11.8231	1.4553		0	71	52.3886	11.3953	1.3524
		1	25	50.094	11.7945	2.3589		1	25	50.094	11.7945	2.3589
		Diff (1-2)		2.3225	11.8154	2.7748		Diff (1-2)		2.2946	11.4986	2.6741
		Method	Variances	DF	t Value	Pr > |t|		Method	Variances	DF	t Value	Pr > |t|
		Pooled	Equal	89	0.84	0.4048		Pooled	Equal	94	0.86	0.393
	Repetitive rotations
		complete	N	Mean	Std Dev	Std Err		complete	N	Mean	Std Dev	Std Err
		0	67	87.6169	17.8502	2.1807		0	71	87.5041	17.3396	2.0578
		1	24	80.9688	19.2755	3.9346		1	25	81.1231	18.8854	3.7771
		Diff (1-2)		6.6481	18.2292	4.3366		Diff (1-2)		6.381	17.7471	4.1273
		Method	Variances	DF	t Value	Pr > |t|		Method	Variances	DF	t Value	Pr > |t|
		Pooled	Equal	89	1.53	0.1288		Pooled	Equal	94	1.55	0.1255

## Sheet: T5
		Table A03: Comparison (independent samples t-test) between dropouts (complete = 0) en de non-dropouts (complete = 1)
		Data at T5						Pooled imputed data at T5
Covariates:
	WOMAC(Function)
		complete	N	Mean	Std Dev	Std Err		complete	N	Mean	Std Dev	Std Err
		0	6	78.1863	23.5187	9.6015		0	71	72.1214	6.6054	0.7839
		1	25	69.2353	19.2254	3.8451		1	25	69.2353	19.2254	3.8451
		Diff (1-2)		8.951	20.0314	9.1064		Diff (1-2)		2.8861	11.2632	2.6194
		Method	Variances	DF	t Value	Pr > |t|		Method	Variances	DF	t Value	Pr > |t|
		Pooled	Equal	29	0.98	0.3338		Pooled	Equal	94	1.1	0.2734
	WOMAC(pain)
		complete	N	Mean	Std Dev	Std Err		complete	N	Mean	Std Dev	Std Err
		0	6	83.3333	25.4296	10.3816		0	71	73.7925	7.4472	0.8838
		1	25	70.8	17.0587	3.4117		1	25	70.8	17.0587	3.4117
		Diff (1-2)		12.5333	18.7702	8.5331		Diff (1-2)		2.9925	10.7517	2.5004
		Method	Variances	DF	t Value	Pr > |t|		Method	Variances	DF	t Value	Pr > |t|
		Pooled	Equal	29	1.47	0.1527		Pooled	Equal	94	1.2	0.2344
	Work participation
		complete	N	Mean	Std Dev	Std Err		complete	N	Mean	Std Dev	Std Err
		0	6	0.3333	0.5164	0.2108		0	71	0.4796	0.1829	0.0217
		1	20	0.45	0.5104	0.1141		1	25	0.44	0.4562	0.0912
		Diff (1-2)		-0.1167	0.5117	0.2382		Diff (1-2)		0.0396	0.2794	0.065
		Method	Variances	DF	t Value	Pr > |t|		Method	Variances	DF	t Value	Pr > |t|
		Pooled	Equal	24	-0.49	0.6287		Pooled	Equal	94	0.61	0.5439
FCE tests:
	Lifting Low (kg)
		complete	N	Mean	Std Dev	Std Err		complete	N	Mean	Std Dev	Std Err
		0	7	17.2857	6.3434	2.3976		0	71	19.0387	2.9804	0.3537
		1	25	20.84	10.2578	2.0516		1	25	20.84	10.2578	2.0516
		Diff (1-2)		-3.5543	9.6035	4.1066		Diff (1-2)		-1.8013	5.7862	1.3457
		Method	Variances	DF	t Value	Pr > |t|		Method	Variances	DF	t Value	Pr > |t|
		Pooled	Equal	30	-0.87	0.3936		Pooled	Equal	94	-1.34	0.1839
	Lifting High (kg)
		complete	N	Mean	Std Dev	Std Err		complete	N	Mean	Std Dev	Std Err
		0	7	8.4286	3.0472	1.1518		0	71	11.0937	2.4251	0.2878
		1	25	10.44	6.2522	1.2504		1	25	10.44	6.2522	1.2504
		Diff (1-2)		-2.0114	5.7558	2.4613		Diff (1-2)		0.6537	3.7895	0.8813
		Method	Variances	DF	t Value	Pr > |t|		Method	Variances	DF	t Value	Pr > |t|
		Pooled	Equal	30	-0.82	0.4202		Pooled	Equal	94	0.74	0.4601
	Carrying (kg)
		complete	N	Mean	Std Dev	Std Err		complete	N	Mean	Std Dev	Std Err
		0	7	16.1429	6.2564	2.3647		0	71	18.9	3.1796	0.3774
		1	25	22.6	12.9228	2.5846		1	25	22.6	12.9228	2.5846
		Diff (1-2)		-6.4571	11.8924	5.0854		Diff (1-2)		-3.7	7.0829	1.6472
		Method	Variances	DF	t Value	Pr > |t|		Method	Variances	DF	t Value	Pr > |t|
		Pooled	Equal	30	-1.27	0.2139		Pooled	Equal	94	-2.25	0.027
	Overhead static
		complete	N	Mean	Std Dev	Std Err		complete	N	Mean	Std Dev	Std Err
		0	7	258	96.3812	36.4287		0	71	197.2	34.8112	4.1313
		1	24	172.2	90.189	18.4098		1	25	173	88.3774	17.6755
		Diff (1-2)		85.7583	91.5045	39.3069		Diff (1-2)		24.1905	53.8201	12.5164
		Method	Variances	DF	t Value	Pr > |t|		Method	Variances	DF	t Value	Pr > |t|
		Pooled	Equal	29	2.18	0.0374		Pooled	Equal	94	1.93	0.0563
	Repetitive knee bending
		complete	N	Mean	Std Dev	Std Err		complete	N	Mean	Std Dev	Std Err
		0	7	46.2857	9.5519	3.6103		0	71	51.1276	3.3	0.3916
		1	23	51.5926	11.5481	2.4079		1	25	51.6016	11.0567	2.2113
		Diff (1-2)		-5.3069	11.1504	4.8133		Diff (1-2)		-0.474	6.2708	1.4583
		Method	Variances	DF	t Value	Pr > |t|		Method	Variances	DF	t Value	Pr > |t|
		Pooled	Equal	28	-1.1	0.2796		Pooled	Equal	94	-0.33	0.7459
	Repetitive rotations
		complete	N	Mean	Std Dev	Std Err		complete	N	Mean	Std Dev	Std Err
		0	7	82.7143	23.3075	8.8094		0	71	78.6975	6.9954	0.8302
		1	25	77.5408	15.408	3.0816		1	25	77.5408	15.408	3.0816
		Diff (1-2)		5.1735	17.2793	7.3889		Diff (1-2)		1.1567	9.8517	2.2911
		Method	Variances	DF	t Value	Pr > |t|		Method	Variances	DF	t Value	Pr > |t|
		Pooled	Equal	30	0.7	0.4892		Pooled	Equal	94	0.5	0.6148
Legenda:
complete = 0 : subjects who have not been assessed on all follow-up measurements (T0,T1,T2, and T5)
complete = 1 : subjects who have been assessed on all follow-up measurements (T0,T1,T2, and T5)
equal = t-test is performed on equal variances assumed based on Levene’s test
